# Supplementary material for: Therapeutic Effect of α-MSH in Primary Cultured Orbital Fibroblasts Obtained from Patients with Thyroid Eye Disease
Source: MDPI journal article supplement (doi:10.3390/ijms222011225), 2021-10-18
Supplement: s1 [file s1]

## Supplementary Materials

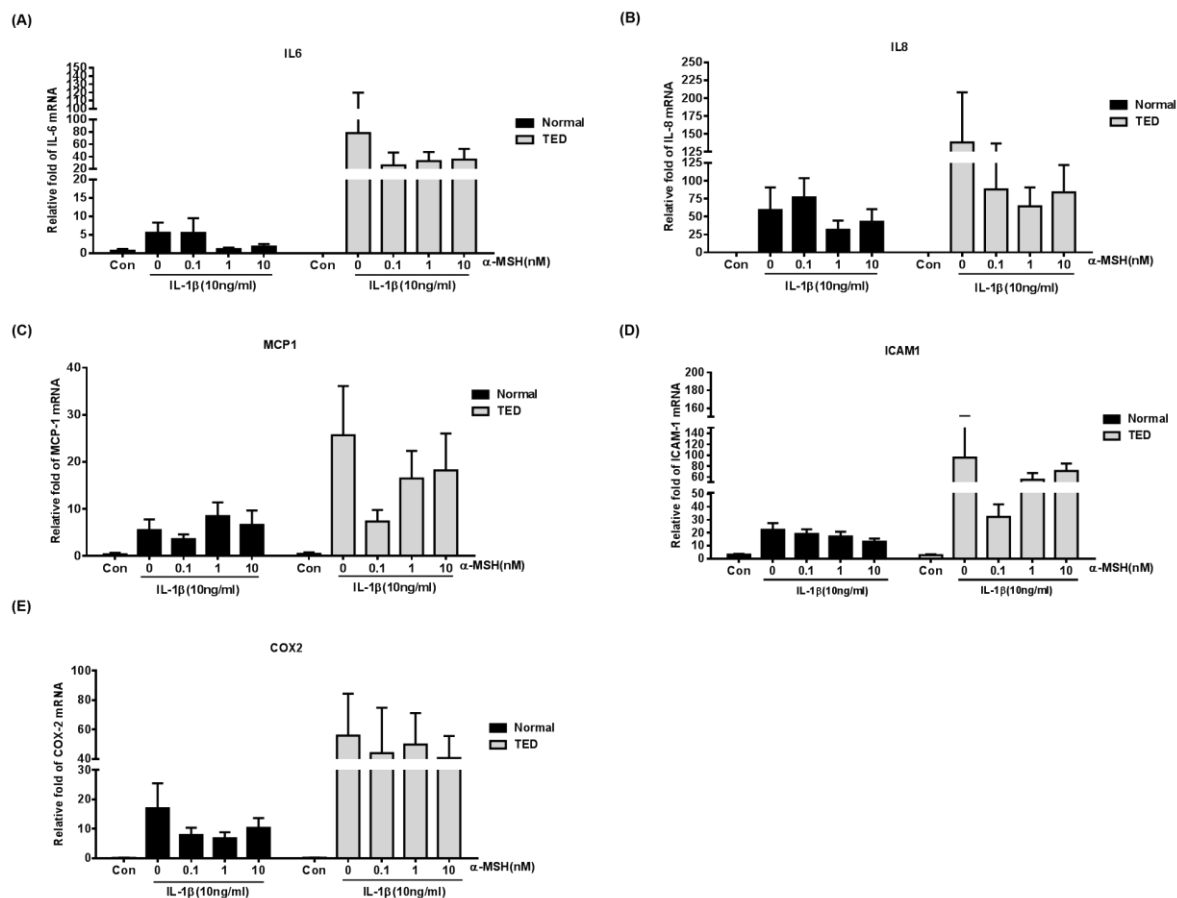

**Figure S1.** Long-term effect of  $\alpha$ -MSH on IL-1 $\beta$ -induced IL-6, IL-8, MCP-1, ICAM-1 and COX-2 mRNA expression in normal and TED orbital fibroblasts. Orbital fibroblasts obtained from normal or TED patients were subjected to 10 ng/mL IL-1 $\beta$  for 16 h, with  $\alpha$ -MSH (0–10 nM) pretreatment for 24 h. IL-6 (A), IL-8 (B), MCP-1 (C), ICAM-1 (D) and COX-2 (E) mRNA levels were evaluated using qPCR. Administration of  $\alpha$ -MSH for 24 h did not attenuate the levels of IL-6, IL-8, MCP-1, ICAM-1, and COX-2 in normal and TED orbital fibroblasts significantly. Gene transcriptional level for cytokines are shown as mean  $\pm$  SEM fold change in cytokine mRNA levels relative to control without  $\alpha$ -MSH treatment. Experiments were performed in triplicates with cells from six different donors.

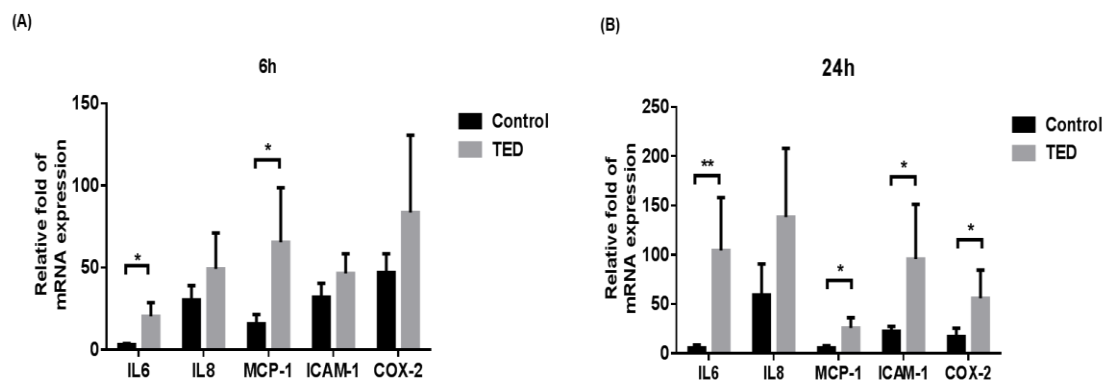

**Figure S2.** IL-1 $\beta$ -induced IL-6, IL-8, MCP-1, ICAM-1 and COX-2 mRNA expression in normal and TED orbital fibroblasts. Orbital fibroblasts obtained from normal control and TED patients were subjected to 10 ng/mL IL-1 $\beta$  for 16 h in 6 h (A) and 24 h (B) mRNA levels were evaluated using qPCR. Gene transcriptional level for cytokines are shown as mean  $\pm$  SEM fold change in cytokine mRNA levels relative to control (relative to the control gene GAPDH). Experiments were performed in triplicates with cells from six different donors. \*  $p < 0.05$ , \*\*  $p < 0.01$  as compared with cells in normal control and TED fibroblasts.
